# Supplementary material for: Peroxidase- and UV-triggered oxidase mimetic activities of the UiO-66-NH2/chitosan composite membrane for antibacterial properties
Source: Royal Society of Chemistry journal article supplement (doi:10.1039/d0bm01960g), 2021-01-01
Supplement: d0bm01960g1.pdf [file d0bm01960g1.pdf]

## Supporting Information

# Peroxidase and UV-Triggered Oxidase Mimetic Activities of UiO-66-NH<sub>2</sub>/Chitosan Composite Membrane for Antibacterial Property

*Xiaojuan Wang<sup>#</sup>, Xuejian Zhou<sup>#†</sup>, Kai Yang<sup>†</sup>, Qiong Li, Rongxin Wan, Guoying Hu, Jin Ye, Yue  
Zhang<sup>†</sup>, Jiahui He<sup>†</sup>, Hanqing Gu, Yongfang Yang<sup>\*†</sup>, Lei Zhu<sup>‡\*</sup>*

Tianjin Institute of Urology, the 2nd Hospital of Tianjin Medical University, Tianjin 300211, P.  
R. China

<sup>†</sup> Institute of Polymer Science and Engineering, Hebei University of Technology, 8 Glory Road,  
Tianjin 300130, P. R. China

<sup>‡</sup> Department of Macromolecular Science and Engineering, Case Western Reserve University,  
Cleveland, OH 44106, United States.

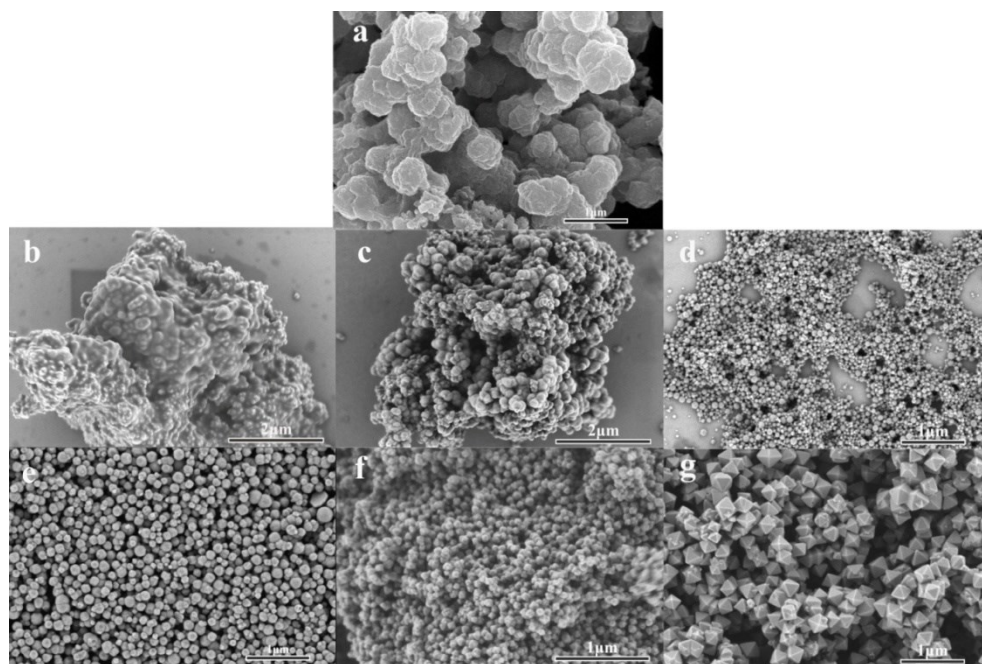

**Figure S1.** SEM image of UiO-66-NH<sub>2</sub> nanoparticles with the varied equivalent ratio of PABA to H<sub>2</sub>ATA, a) 0, b) 10, c) 30, d) 50, e) 75, f) 100, and g) 150.

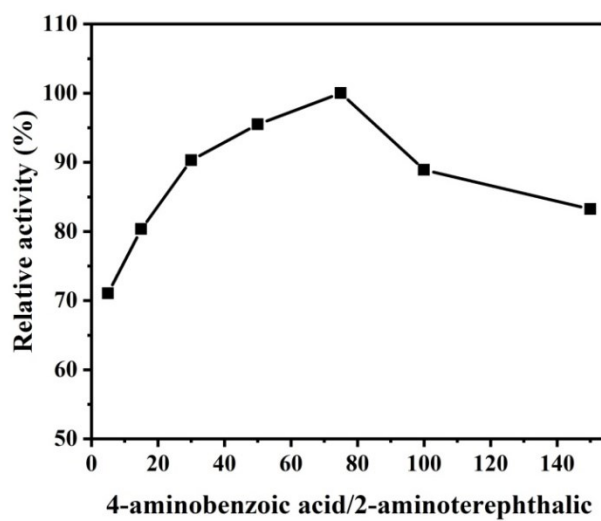

**Figure S2.** Catalytic oxidation of peroxidase substrate TMB·2HCl by H<sub>2</sub>O<sub>2</sub> with different equivalent ratios of PABA to H<sub>2</sub>ATA.

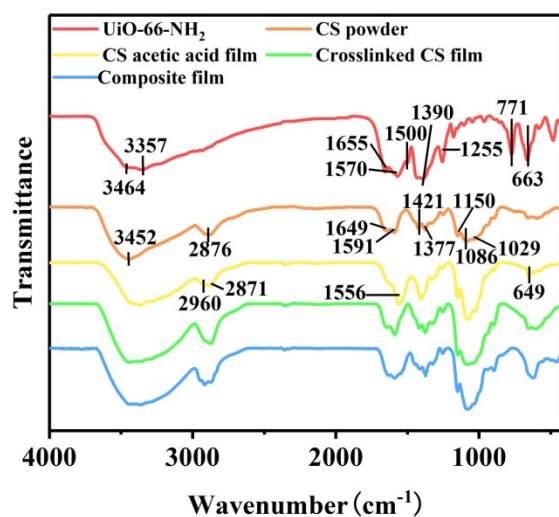

**Figure S3.** FTIR spectra of UiO-66-NH<sub>2</sub>, CS powder, CS acetic acid film, Na<sub>2</sub>SO<sub>4</sub> crosslinked CS film, and UiO-66-NH<sub>2</sub>/CS composite film.

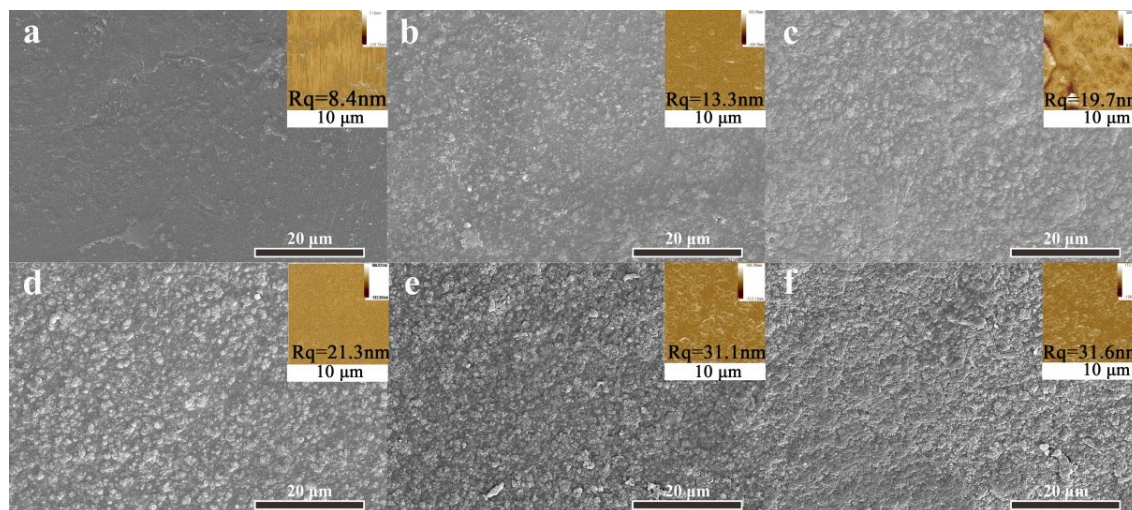

**Figure S4.** SEM ( $\times 3000$ ) and AFM images of the surface morphology of the UiO-66-NH<sub>2</sub>/CS composite membrane with the weight ratio of UiO-66-NH<sub>2</sub> to CS, a) 0:10, b) 1:10, c) 3:10, d) 5:10, e) 7:10, and f) 9:10.

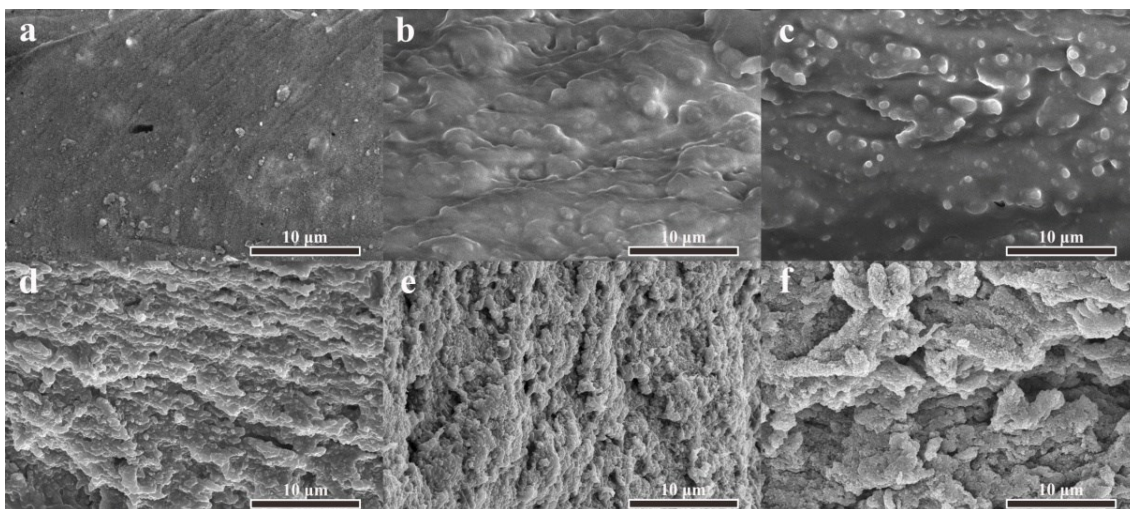

**Figure S5.** The cross-section SEM ( $\times 6000$ ) images of the UiO-66-NH<sub>2</sub>/CS composite membrane with the weight ratio of UiO-66-NH<sub>2</sub> to CS, a) 0:10; b) 1:10, c) 3:10, d) 5:10, e) 7:10 and f) 9:10.

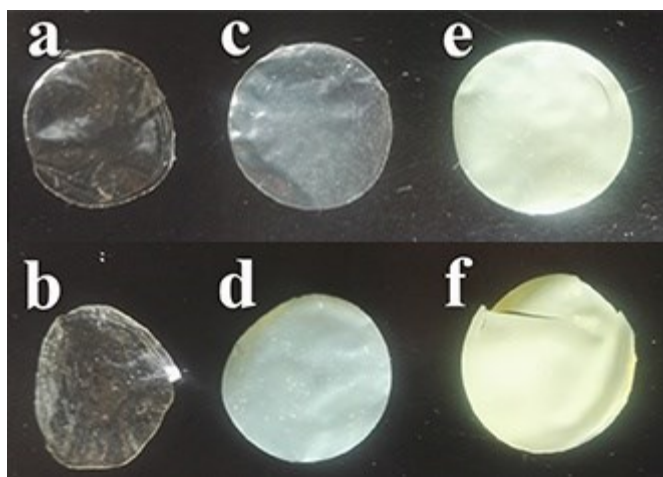

**Figure S6.** Photographs of the UiO-66-NH<sub>2</sub>/CS composite membranes with the varied weight ratios of UiO-66-NH<sub>2</sub> NPs to CS, a-b) 0:10, c) 1:10, d) 3:10, e) 6:10, and f) 9:10.

## Peroxidase-like activity measurements

Acetate buffer solution (0.1 M, pH=4.0, 4 mL), TMB·2HCl (1 mM), H<sub>2</sub>O<sub>2</sub> (3 wt%, 45  $\mu$ L) and 0.25 cm<sup>2</sup> CS or UiO-66-NH<sub>2</sub>/CS composite membrane were added and the reaction mixture was incubated at room temperature for 30 min followed by monitoring the formation of oxidation product of TMB·2HCl at 652 nm using UV-vis spectrophotometry.

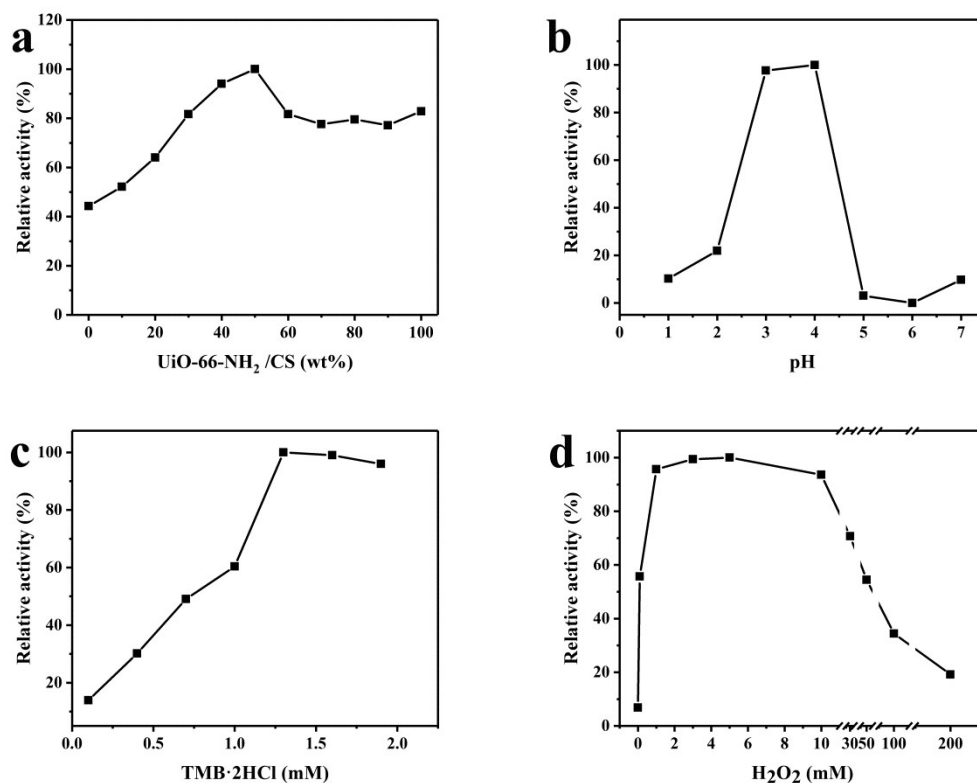

**Figure S7.** The catalytic oxidation of peroxidase substrate TMB·2HCl under different conditions: a) with different weight ratios of UiO-66-NH<sub>2</sub> to CS, b) under different pH conditions, c) with various TMB·2HCl amounts, and d) with various H<sub>2</sub>O<sub>2</sub> amounts.

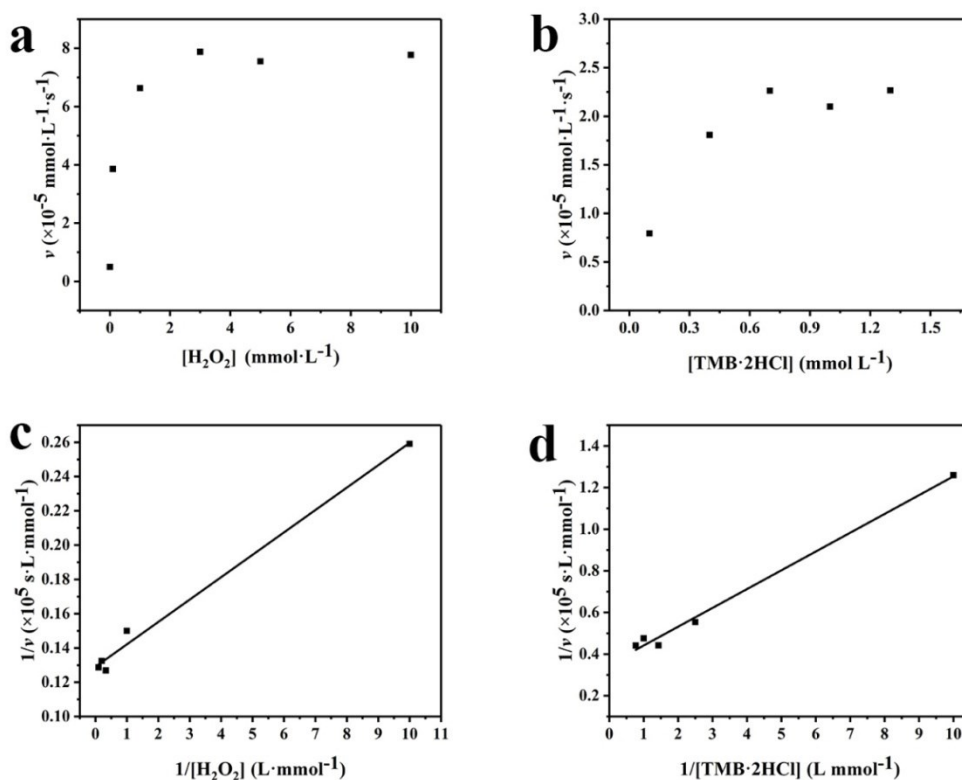

**Figure S8.** The kinetics of the reaction was measured using the UiO-66-NH<sub>2</sub>/CS composite membrane ( $r=0.25$  cm) and TMB·2HCl (1.3 mM) under different (a) H<sub>2</sub>O<sub>2</sub>, and (b) TMB·2HCl concentrations. Corresponding double-reciprocal plots of peroxidase-like activity of the UiO-66-NH<sub>2</sub>/CS composite membrane at a fixed concentration of one substrate versus varying concentration of another substrate for (c) H<sub>2</sub>O<sub>2</sub> or (d) TMB·2HCl.



**Table S1.** The Michaelis-Menten ( $K_m$ ) constant and maximum reaction rate ( $V_{max}$ ) of the UiO-66-NH<sub>2</sub>/CS composite membrane.

| Catalyst                                         | $K_m$ (mM) |                               | $V_{max}$ ( $10^{-8}$ M s <sup>-1</sup> ) |                               |
|--------------------------------------------------|------------|-------------------------------|-------------------------------------------|-------------------------------|
|                                                  | TMB·2HCl   | H <sub>2</sub> O <sub>2</sub> | TMB·2HCl                                  | H <sub>2</sub> O <sub>2</sub> |
| UiO-66-NH <sub>2</sub> /CS composite membrane    | 0.10       | 0.26                          | 7.75                                      | 2.85                          |
| HRP <sup>[1]</sup>                               | 0.17       | 10.9                          | 41.8                                      | 58.5                          |
| GO-Fe <sub>3</sub> O <sub>4</sub> <sup>[2]</sup> | 0.43       | 0.71                          | 13.08                                     | 5.31                          |
| Cu-Ag/rGO <sup>[3]</sup>                         | 0.63       | 8.63                          | 4.26                                      | 7.02                          |
| Hemin@MOF <sup>[4]</sup>                         | 10.9       | 0.07                          | 8.98                                      | 6.07                          |
| MOF-808 <sup>[5]</sup>                           | 0.08       | 1.06                          | 3.12                                      | 1.39                          |

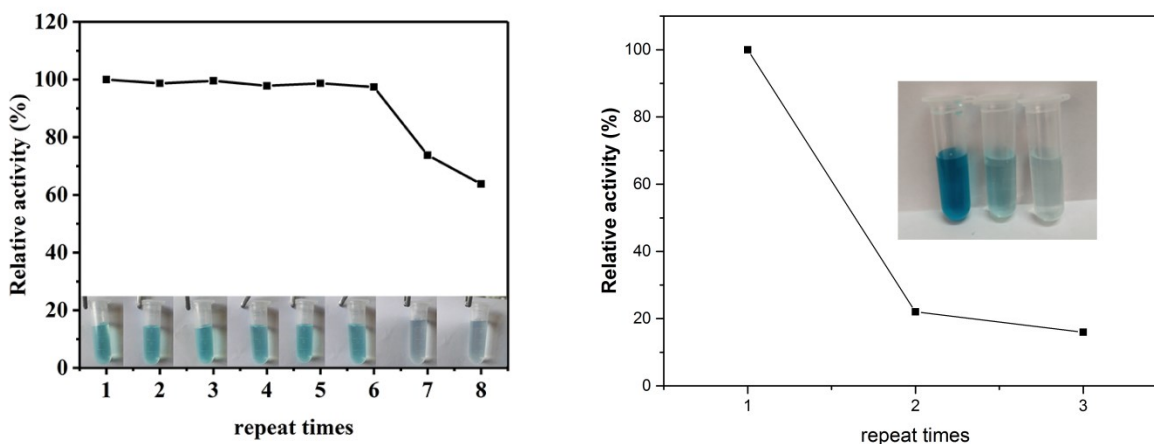

**Figure S9.** a) Photocatalytic stability of UiO-66-NH<sub>2</sub>/CS (50%) composite membrane by 8 cycles of tests; b) Catalytic cycles of UiO-66-NH<sub>2</sub>/CS (50%) composite membrane in the presence of H<sub>2</sub>O<sub>2</sub> at neutral pH. The result showed that the peroxidase-like catalytic activity of UiO-66-NH<sub>2</sub>/chitosan composite membrane obviously decreased.

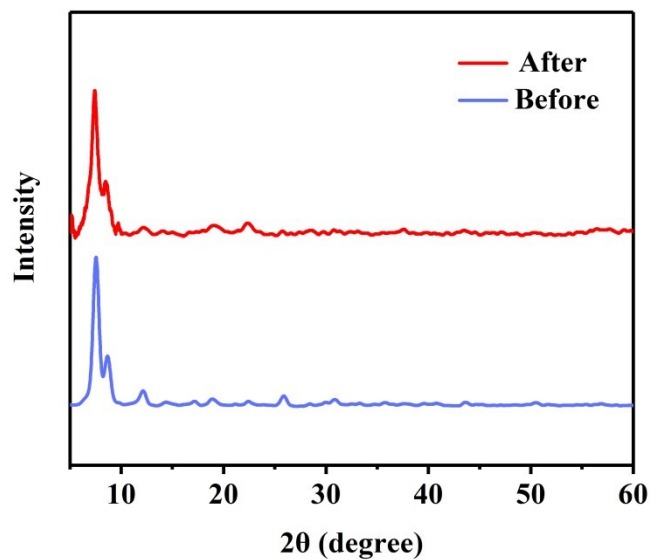

**Figure S10.** Powder XRD profiles for the UiO-66-NH<sub>2</sub>/CS composite membrane before and after photo catalysis.

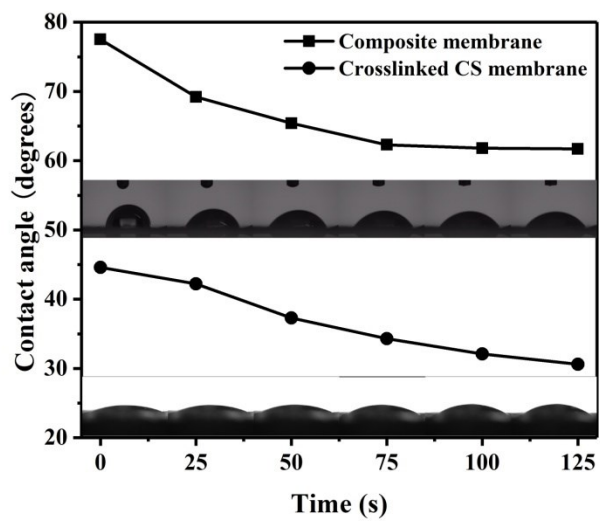

**Figure S11.** Dynamic contact angles of the crosslinked CS membrane and theUiO-66-NH<sub>2</sub>/CS composite membrane.



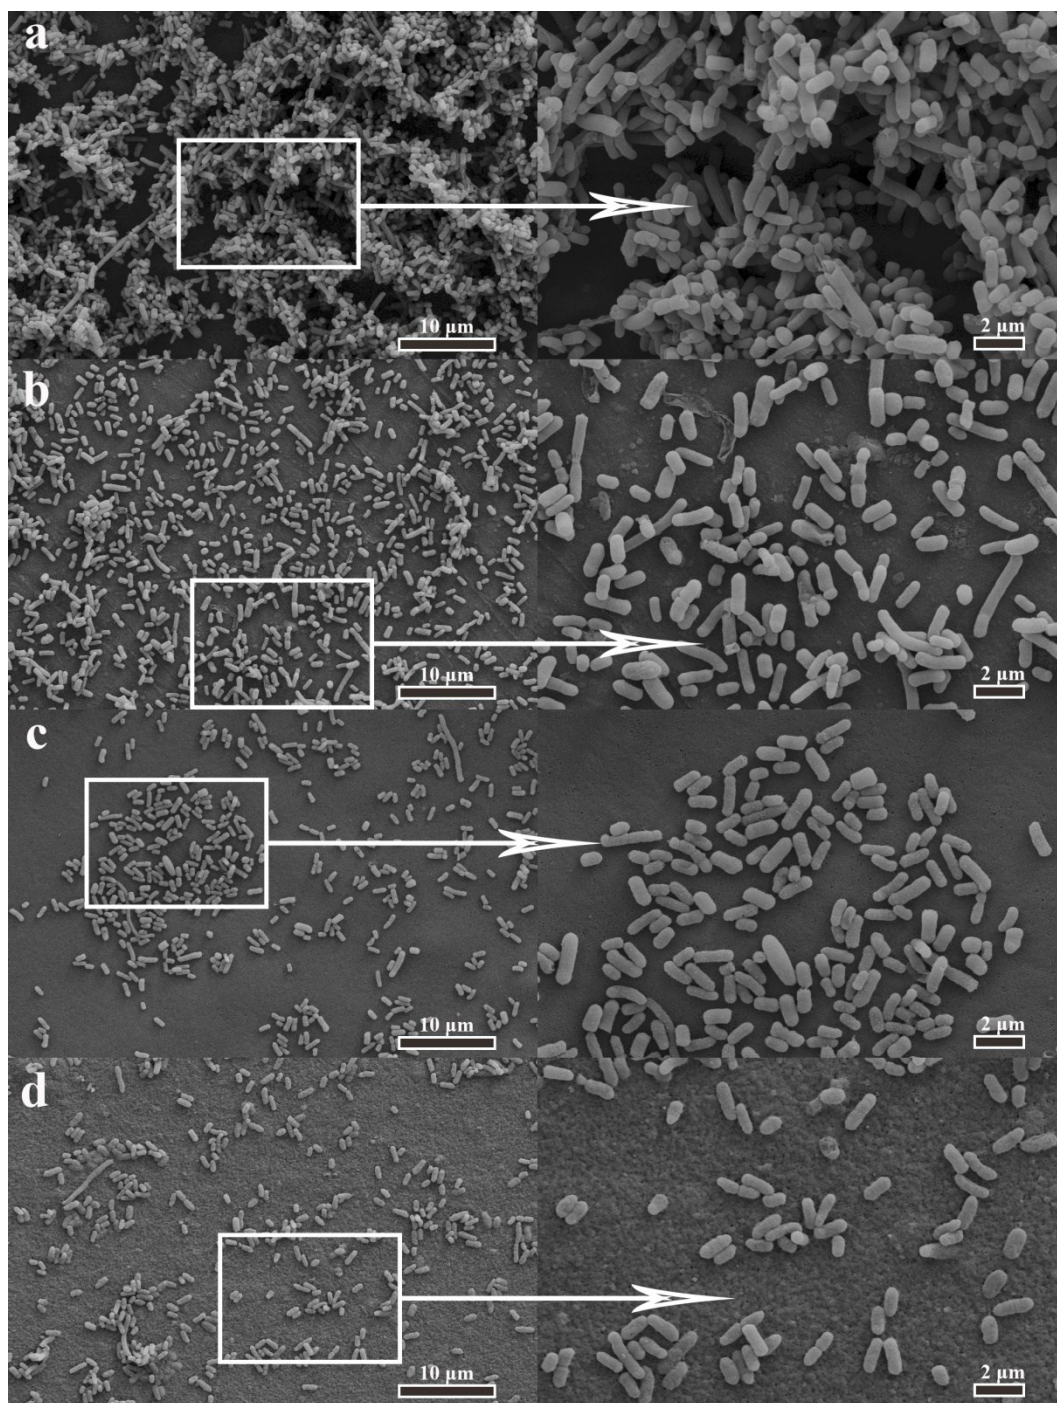

**Figure S12.** The morphology of *E. coli* in solid circumstance: a) CS membrane+PBS, b) CS membrane+H<sub>2</sub>O<sub>2</sub>, c) UiO-66-NH<sub>2</sub>/CS composite membrane+PBS, and d) UiO-66-NH<sub>2</sub>/CS composite membrane+H<sub>2</sub>O<sub>2</sub>, with UV irradiation of the UiO-66-NH<sub>2</sub>/CS composite membrane for 30 min.

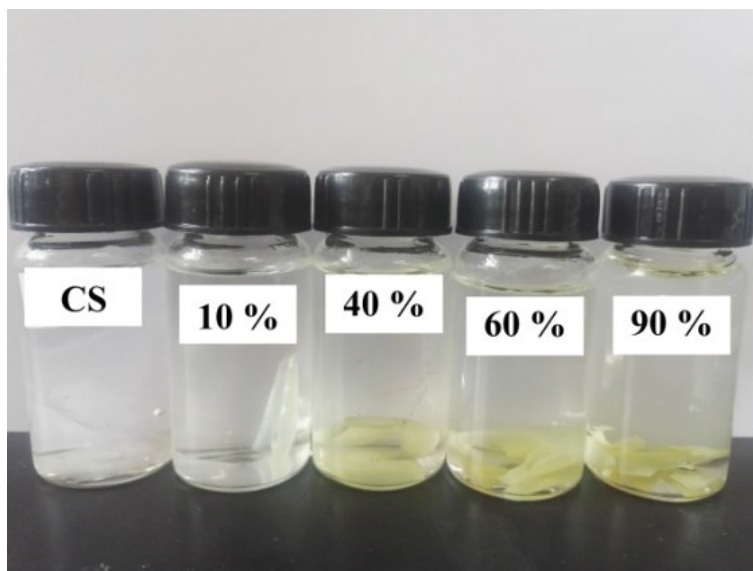

**Figure S13.** Photographs of the UiO-66-NH<sub>2</sub>/CS composite membrane with different weight ratios of UiO-66-NH<sub>2</sub> to CS after immersion into water for 30 days followed by ultrasonication for 2 h.

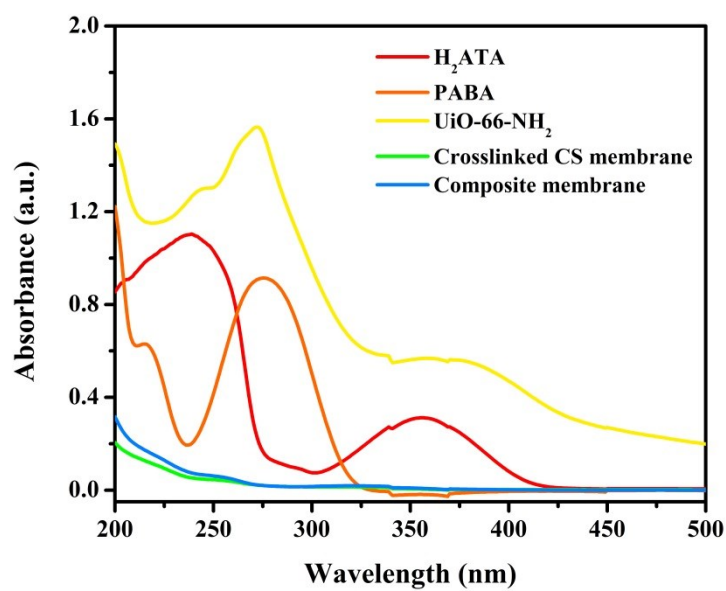

**Figure S14.** The UV-vis absorbance of the liquid taken from the vials with two pieces of membranes (1.5 cm × 2.5 cm) in 20 mL of water.

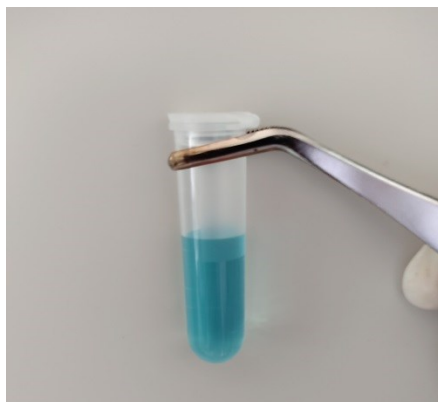

**Figure S15** Peroxidase-like enzymatic activity of UiO-66-NH<sub>2</sub>/chitosan composite membrane stored for two years. The long term stability for peroxidase mimicking was detected in the presence of TMB•2HCl and H<sub>2</sub>O<sub>2</sub>. The reaction solution quickly turned blue, which indicated that its peroxidase-like enzymatic activity was maintained well.

## References

- [1] Lin TR, Zhong LS, Guo LQ, Fu FF, Chen GN. Seeing Diabetes: Visual Detection of Glucose Based on the Intrinsic Peroxidase-like Activity of MoS<sub>2</sub> Nanosheets. *Nanoscale* 2014, 6(20):11856-11862.
- [2] Dong YL, Zhang HG, Rahman Z, Su, L, Chen XJ, Hu J, et al. Graphene oxide-Fe<sub>3</sub>O<sub>4</sub> magnetic nanocomposites with peroxidase-like activity for colorimetric detection of glucose. *Nanoscale*, 2012, 4(13): 3969-3976.
- [3] Gitashree D, Bhagyasmeeeta S, Manash RD, Rabah B, Sabine S. Cu-Ag bimetallic nanoparticles on reduced graphene oxide nanosheets as peroxidase mimic for glucose and ascorbic acid detection. *Sensors & Actuators B Chemical*, 2017, 238: 842-851.

- [4] Qin, FX, Jia, SY, Wang, FF, Wu, SH, Song, J, Liu, Y. Hemin@metal-organic framework with peroxidase-like activity and its application to glucose detection. *Catal. Sci. Technol.* 2013, 3: 2761-2768
- [5] Heng, HQ, Liu, CY, Zeng, XY, Chen, J, Lu, J, Lin, RG, et al. MOF-808: A Metal-Organic Framework with Intrinsic PeroxidaseLike Catalytic Activity at Neutral pH for Colorimetric Biosensing. *Inorg. Chem.* 2018, 57: 9096-9104
